# Supplementary material for: Improving succinylation prediction accuracy by incorporating the secondary structure via helix, strand and coil, and evolutionary information from profile bigrams
Source: PLoS One. 2018 Feb 12;13(2):e0191900. doi: 10.1371/journal.pone.0191900 (PMC5809022; doi:10.1371/journal.pone.0191900)
Supplement: S1 File — (XLSX) [file pone.0191900.s001.xlsx]

## Sheet: S1 File
	6-fold cross validation					8-fold cross validation				10-fold cross validation
		Sensitivity	Specificity	Accuracy	MCC	Sensitivity	Specificity	Accuracy	MCC	Sensitivity	Specificity	Accuracy	MCC
	1	0.882	0.78	0.831	0.665	0.882	0.787	0.835	0.673	0.883	0.79	0.836	0.676
	2	0.881	0.77	0.825	0.655	0.881	0.761	0.821	0.647	0.872	0.764	0.818	0.64
	3	0.878	0.773	0.825	0.654	0.89	0.772	0.831	0.666	0.874	0.772	0.823	0.65
	4	0.885	0.775	0.83	0.664	0.88	0.773	0.827	0.657	0.883	0.778	0.83	0.664
	5	0.868	0.783	0.826	0.654	0.878	0.753	0.815	0.636	0.871	0.756	0.814	0.632
	6	0.871	0.799	0.835	0.672	0.873	0.777	0.825	0.653	0.859	0.781	0.82	0.642
	7	0.863	0.778	0.821	0.644	0.872	0.767	0.819	0.642	0.861	0.767	0.814	0.631
	8	0.882	0.785	0.833	0.669	0.878	0.775	0.827	0.657	0.884	0.769	0.827	0.658
	9	0.883	0.766	0.824	0.653	0.878	0.792	0.835	0.672	0.88	0.774	0.827	0.659
	10	0.875	0.768	0.822	0.647	0.878	0.762	0.82	0.645	0.877	0.774	0.825	0.654
	11	0.878	0.791	0.834	0.671	0.872	0.802	0.837	0.676	0.878	0.779	0.829	0.66
	12	0.876	0.782	0.829	0.661	0.883	0.783	0.833	0.669	0.874	0.77	0.822	0.648
	13	0.882	0.769	0.826	0.656	0.871	0.786	0.829	0.66	0.879	0.764	0.822	0.648
	14	0.875	0.786	0.831	0.664	0.884	0.768	0.826	0.657	0.878	0.786	0.832	0.666
	15	0.861	0.788	0.825	0.651	0.873	0.777	0.825	0.652	0.878	0.765	0.822	0.647
	16	0.874	0.786	0.83	0.663	0.873	0.785	0.829	0.66	0.882	0.783	0.832	0.668
	17	0.874	0.773	0.823	0.65	0.88	0.771	0.826	0.655	0.878	0.788	0.833	0.669
	18	0.874	0.791	0.832	0.667	0.885	0.777	0.831	0.666	0.881	0.779	0.83	0.663
	19	0.866	0.78	0.823	0.649	0.874	0.762	0.818	0.64	0.874	0.77	0.822	0.647
	20	0.877	0.778	0.827	0.658	0.88	0.782	0.831	0.665	0.878	0.768	0.823	0.65
	21	0.875	0.775	0.825	0.653	0.874	0.785	0.829	0.661	0.875	0.778	0.827	0.656
	22	0.871	0.784	0.828	0.658	0.879	0.77	0.825	0.654	0.884	0.781	0.832	0.669
	23	0.877	0.785	0.831	0.664	0.876	0.765	0.821	0.645	0.882	0.768	0.825	0.654
	24	0.878	0.77	0.824	0.652	0.872	0.766	0.819	0.642	0.878	0.771	0.824	0.652
	25	0.874	0.769	0.822	0.647	0.871	0.774	0.823	0.648	0.871	0.779	0.825	0.653
	26	0.891	0.756	0.823	0.652	0.886	0.761	0.823	0.652	0.868	0.789	0.828	0.659
	27	0.874	0.782	0.828	0.659	0.871	0.783	0.827	0.657	0.878	0.792	0.835	0.673
	28	0.866	0.791	0.828	0.658	0.873	0.772	0.822	0.648	0.872	0.782	0.827	0.657
	29	0.864	0.772	0.818	0.638	0.873	0.774	0.824	0.65	0.866	0.762	0.814	0.632
	30	0.875	0.772	0.823	0.65	0.876	0.788	0.832	0.666	0.878	0.775	0.827	0.657
	31	0.87	0.793	0.832	0.666	0.873	0.782	0.827	0.658	0.875	0.785	0.83	0.663
	32	0.872	0.773	0.822	0.648	0.871	0.777	0.824	0.651	0.876	0.787	0.832	0.666
	33	0.875	0.769	0.822	0.647	0.884	0.759	0.822	0.648	0.877	0.76	0.818	0.641
	34	0.875	0.777	0.826	0.656	0.873	0.79	0.832	0.666	0.872	0.788	0.83	0.662
	35	0.884	0.768	0.826	0.657	0.877	0.783	0.83	0.663	0.868	0.787	0.827	0.657
	36	0.878	0.767	0.822	0.649	0.884	0.763	0.824	0.652	0.877	0.795	0.836	0.674
	37	0.876	0.78	0.828	0.659	0.88	0.79	0.835	0.673	0.871	0.787	0.829	0.661
	38	0.876	0.772	0.824	0.651	0.878	0.772	0.825	0.653	0.868	0.792	0.83	0.662
	39	0.86	0.785	0.823	0.647	0.879	0.756	0.818	0.64	0.881	0.769	0.825	0.654
	40	0.872	0.768	0.82	0.644	0.885	0.781	0.833	0.669	0.879	0.782	0.83	0.664
	41	0.874	0.776	0.825	0.653	0.88	0.78	0.83	0.664	0.885	0.771	0.828	0.66
	42	0.875	0.765	0.82	0.645	0.876	0.777	0.826	0.656	0.877	0.77	0.824	0.651
	43	0.87	0.774	0.822	0.647	0.879	0.775	0.827	0.657	0.88	0.767	0.824	0.651
	44	0.871	0.782	0.827	0.656	0.863	0.775	0.819	0.641	0.868	0.763	0.815	0.634
	45	0.873	0.759	0.816	0.635	0.88	0.781	0.83	0.664	0.871	0.806	0.839	0.679
	46	0.874	0.779	0.827	0.656	0.868	0.778	0.823	0.649	0.879	0.764	0.822	0.648
	47	0.87	0.761	0.816	0.635	0.873	0.769	0.821	0.646	0.874	0.775	0.825	0.652
	48	0.879	0.745	0.812	0.63	0.884	0.777	0.831	0.665	0.872	0.785	0.829	0.66
	49	0.874	0.766	0.82	0.643	0.885	0.779	0.832	0.668	0.877	0.758	0.817	0.639
	50	0.88	0.778	0.829	0.662	0.887	0.753	0.82	0.646	0.882	0.784	0.833	0.669
	51	0.879	0.747	0.813	0.631	0.88	0.8	0.84	0.682	0.882	0.778	0.83	0.664
	52	0.882	0.781	0.832	0.667	0.881	0.781	0.831	0.666	0.869	0.787	0.828	0.658
	53	0.873	0.781	0.827	0.656	0.889	0.767	0.828	0.661	0.883	0.756	0.82	0.644
	54	0.879	0.782	0.831	0.665	0.877	0.78	0.829	0.66	0.873	0.788	0.831	0.664
	55	0.866	0.78	0.823	0.649	0.876	0.778	0.827	0.657	0.869	0.782	0.826	0.654
	56	0.887	0.768	0.828	0.66	0.893	0.761	0.827	0.66	0.887	0.784	0.835	0.674
	57	0.873	0.775	0.824	0.651	0.873	0.772	0.822	0.648	0.881	0.776	0.829	0.661
	58	0.888	0.786	0.837	0.677	0.895	0.755	0.825	0.656	0.892	0.774	0.833	0.671
	59	0.873	0.776	0.825	0.652	0.866	0.776	0.821	0.645	0.883	0.778	0.83	0.664
	60	0.881	0.785	0.833	0.669	0.876	0.788	0.832	0.666	0.877	0.78	0.829	0.66
	61	0.878	0.783	0.83	0.663	0.876	0.768	0.822	0.648	0.886	0.762	0.824	0.653
	62	0.883	0.76	0.821	0.647	0.889	0.776	0.833	0.67	0.874	0.797	0.836	0.673
	63	0.878	0.792	0.835	0.672	0.879	0.777	0.828	0.659	0.884	0.783	0.834	0.671
	64	0.872	0.785	0.828	0.659	0.88	0.755	0.817	0.64	0.881	0.779	0.83	0.664
	65	0.88	0.773	0.826	0.656	0.869	0.783	0.826	0.655	0.881	0.795	0.838	0.678
	66	0.87	0.792	0.831	0.665	0.882	0.768	0.825	0.654	0.879	0.779	0.829	0.662
	67	0.877	0.781	0.829	0.661	0.877	0.772	0.825	0.653	0.888	0.775	0.831	0.667
	68	0.874	0.781	0.828	0.658	0.882	0.781	0.831	0.666	0.884	0.778	0.831	0.665
	69	0.869	0.781	0.825	0.652	0.865	0.788	0.827	0.655	0.883	0.763	0.823	0.651
	70	0.866	0.777	0.822	0.646	0.874	0.782	0.828	0.659	0.874	0.786	0.83	0.662
	71	0.879	0.756	0.818	0.64	0.874	0.764	0.819	0.643	0.882	0.783	0.832	0.668
	72	0.874	0.788	0.831	0.664	0.874	0.768	0.821	0.646	0.883	0.778	0.831	0.665
	73	0.877	0.773	0.825	0.654	0.879	0.777	0.828	0.659	0.874	0.768	0.821	0.646
	74	0.866	0.762	0.814	0.631	0.884	0.784	0.834	0.671	0.879	0.774	0.827	0.657
	75	0.875	0.79	0.832	0.667	0.882	0.767	0.825	0.654	0.867	0.791	0.829	0.66
	76	0.874	0.758	0.816	0.636	0.874	0.784	0.829	0.661	0.871	0.773	0.822	0.647
	77	0.878	0.78	0.829	0.661	0.882	0.788	0.835	0.673	0.882	0.78	0.831	0.666
	78	0.873	0.788	0.831	0.663	0.875	0.768	0.822	0.647	0.875	0.777	0.826	0.656
	79	0.873	0.777	0.825	0.653	0.882	0.77	0.826	0.656	0.877	0.754	0.816	0.636
	80	0.873	0.774	0.824	0.65	0.878	0.758	0.818	0.641	0.88	0.781	0.831	0.665
	81	0.869	0.777	0.823	0.649	0.879	0.754	0.817	0.639	0.878	0.777	0.828	0.659
	82	0.885	0.78	0.832	0.669	0.871	0.79	0.831	0.663	0.87	0.777	0.824	0.65
	83	0.873	0.778	0.825	0.654	0.891	0.762	0.826	0.658	0.87	0.782	0.826	0.655
	84	0.875	0.779	0.827	0.658	0.891	0.774	0.832	0.67	0.879	0.773	0.826	0.656
	85	0.874	0.774	0.824	0.651	0.874	0.77	0.822	0.648	0.875	0.783	0.829	0.661
	86	0.877	0.777	0.827	0.658	0.871	0.782	0.826	0.655	0.877	0.785	0.831	0.664
	87	0.879	0.776	0.828	0.659	0.881	0.759	0.82	0.645	0.882	0.775	0.828	0.66
	88	0.866	0.793	0.83	0.661	0.87	0.774	0.822	0.648	0.874	0.793	0.834	0.669
	89	0.882	0.779	0.831	0.665	0.88	0.774	0.827	0.658	0.882	0.767	0.825	0.654
	90	0.889	0.755	0.822	0.651	0.884	0.772	0.828	0.66	0.88	0.773	0.827	0.658
	91	0.859	0.791	0.825	0.652	0.884	0.762	0.823	0.651	0.884	0.784	0.834	0.672
	92	0.882	0.774	0.828	0.66	0.871	0.783	0.827	0.656	0.886	0.766	0.826	0.656
	93	0.867	0.767	0.817	0.637	0.882	0.783	0.832	0.668	0.876	0.778	0.827	0.657
	94	0.878	0.769	0.823	0.65	0.876	0.763	0.82	0.643	0.876	0.779	0.828	0.659
	95	0.878	0.782	0.83	0.662	0.876	0.773	0.824	0.652	0.872	0.794	0.833	0.668
	96	0.89	0.777	0.834	0.672	0.879	0.777	0.828	0.659	0.884	0.773	0.829	0.661
	97	0.875	0.774	0.824	0.652	0.884	0.769	0.827	0.658	0.881	0.786	0.833	0.67
	98	0.877	0.795	0.836	0.673	0.883	0.767	0.825	0.654	0.878	0.79	0.834	0.671
	99	0.869	0.787	0.828	0.658	0.877	0.779	0.828	0.66	0.879	0.785	0.832	0.667
	100	0.872	0.785	0.829	0.66	0.882	0.758	0.82	0.645	0.88	0.772	0.826	0.656
	MEAN	0.87514	0.77675	0.82597	0.6551	0.87824	0.77408	0.8262	0.65601	0.87728	0.7776	0.82751	0.6583
